# Supplementary material for: Combined Treatment (Ultraviolet-C/Physapruin A) Enhances Antiproliferation and Oxidative-Stress-Associated Mechanism in Oral Cancer Cells
Source: MDPI journal article supplement (doi:10.3390/antiox11112227), 2022-11-11
Supplement: s1 [file s1]

**Table S1.** Synergy values ( $\alpha$ ) for all combined treatments (UVC/PHA) to oral cancer (Ca9-22 and CAL 27) and normal (SG) cells

| Treatment                  |    | PHA ( $\mu\text{M}$ ) |                 |                 |        |
|----------------------------|----|-----------------------|-----------------|-----------------|--------|
|                            |    | 0.4                   | 0.6             | 0.8             |        |
| UVC<br>(J/m <sup>2</sup> ) | 8  | 1.06 $\pm$ 0.06       | 1.11 $\pm$ 0.07 | 1.15 $\pm$ 0.06 | Ca9-22 |
|                            | 10 | 1.14 $\pm$ 0.06       | 1.13 $\pm$ 0.06 | 1.23 $\pm$ 0.10 |        |
|                            | 8  | 1.17 $\pm$ 0.09       | 1.28 $\pm$ 0.01 | 1.46 $\pm$ 0.20 | CAL 27 |
|                            | 10 | 1.06 $\pm$ 0.05       | 1.11 $\pm$ 0.06 | 1.25 $\pm$ 0.21 |        |
|                            | 8  | 1.05 $\pm$ 0.00       | 1.02 $\pm$ 0.07 | 0.99 $\pm$ 0.06 | SG     |
|                            | 10 | 1.09 $\pm$ 0.08       | 1.12 $\pm$ 0.04 | 1.09 $\pm$ 0.02 |        |

Cells were irradiated with UVC and incubated in control and PHA (0.4, 0.6, and 0.8  $\mu\text{M}$ ) for 24 h. Finally, the cell viabilities were determined by ATP assay and the synergy values ( $\alpha$ ) were calculated as described in Materials and Methods. Data, mean $\pm$ SD (n = 3).
